**Manuscript title: Computational analysis suggests putative intermediate animal hosts of the SARS-CoV-2**

Peng Chu<sup>1,2</sup>, Zheng Zhou<sup>2</sup>, Zhichen Gao<sup>1</sup>, Ruiqi Cai<sup>1</sup>, Sijin Wu<sup>3,\*</sup>, Zhaolin Sun<sup>2</sup>, Shuyuan Chen<sup>4</sup>, Yongliang Yang<sup>1,\*</sup>

**Disclaimer Statement:**

The authors have withdrawn their manuscript whilst they wish to perform additional experiments to validate their conclusions further. Therefore, the authors do not wish this work to be cited as reference for the project. If you have any questions, please contact the corresponding author for more details.
